# Supplementary material
Source: PubMed Central journal article supplement (PMC3003394)

# Supplemental figure 1

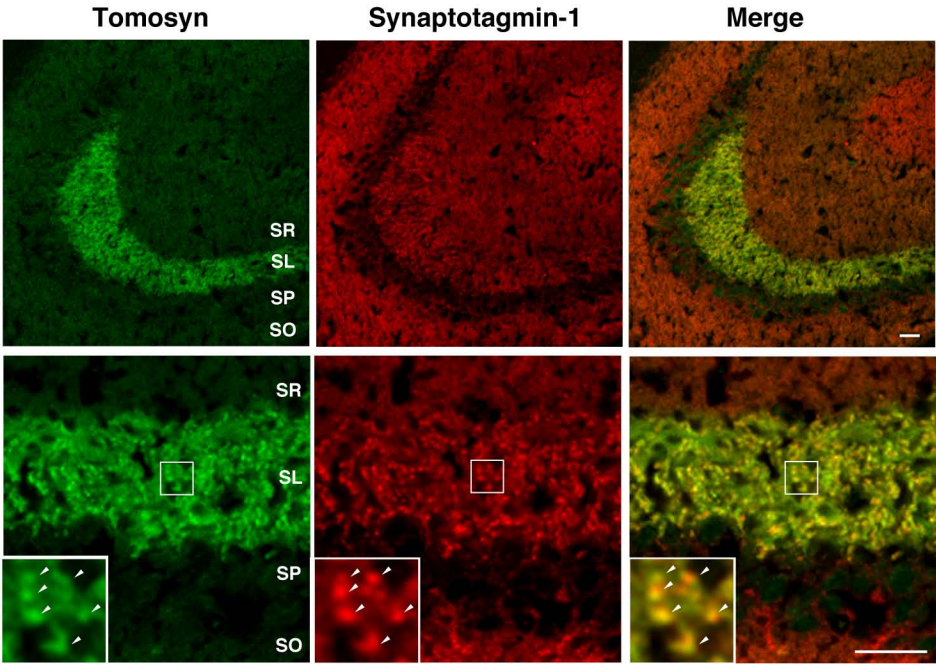

# Supplemental figure 2

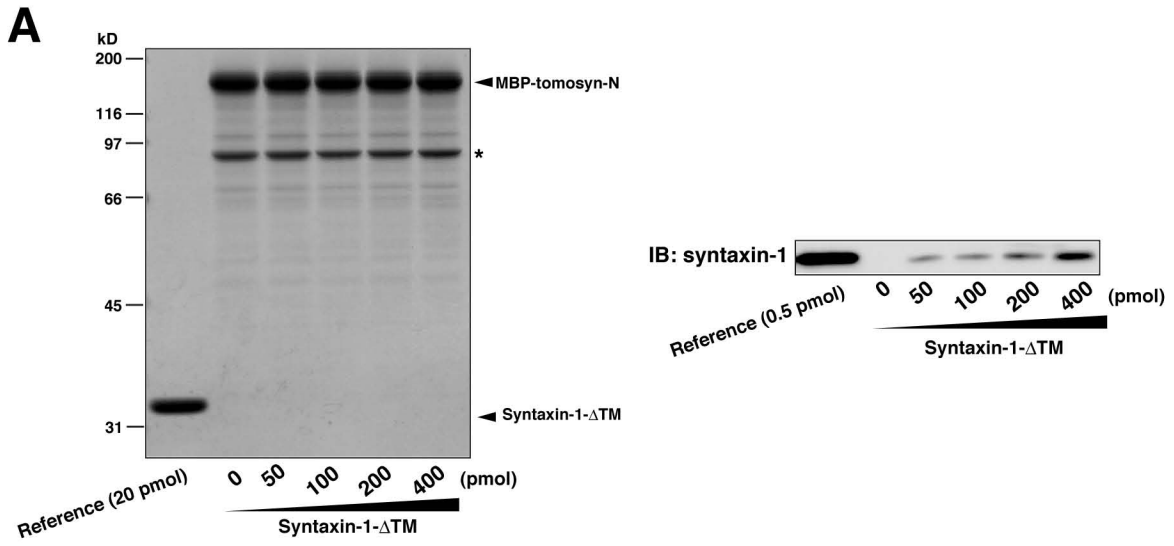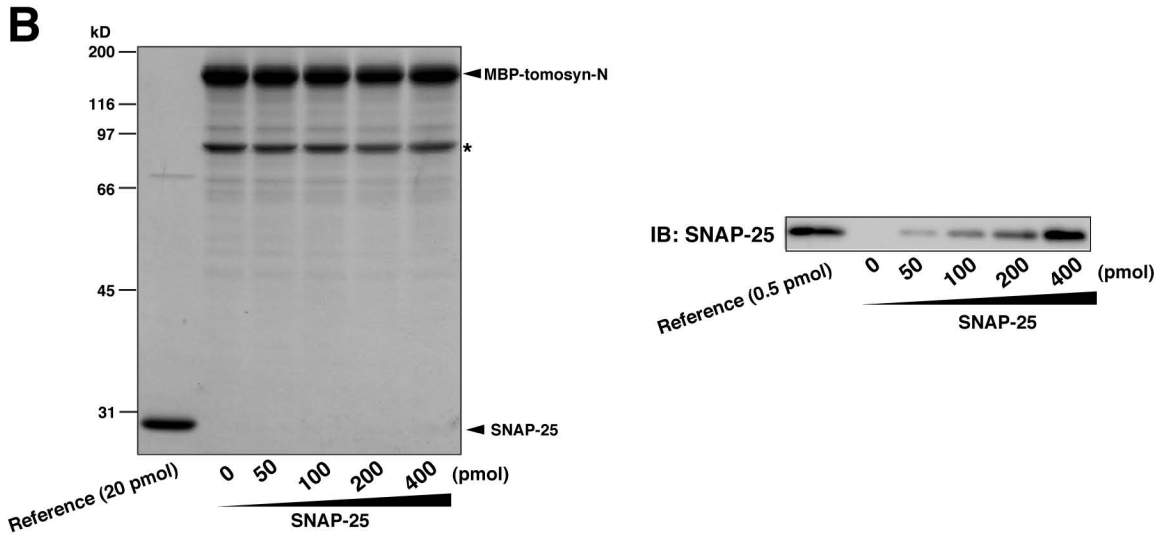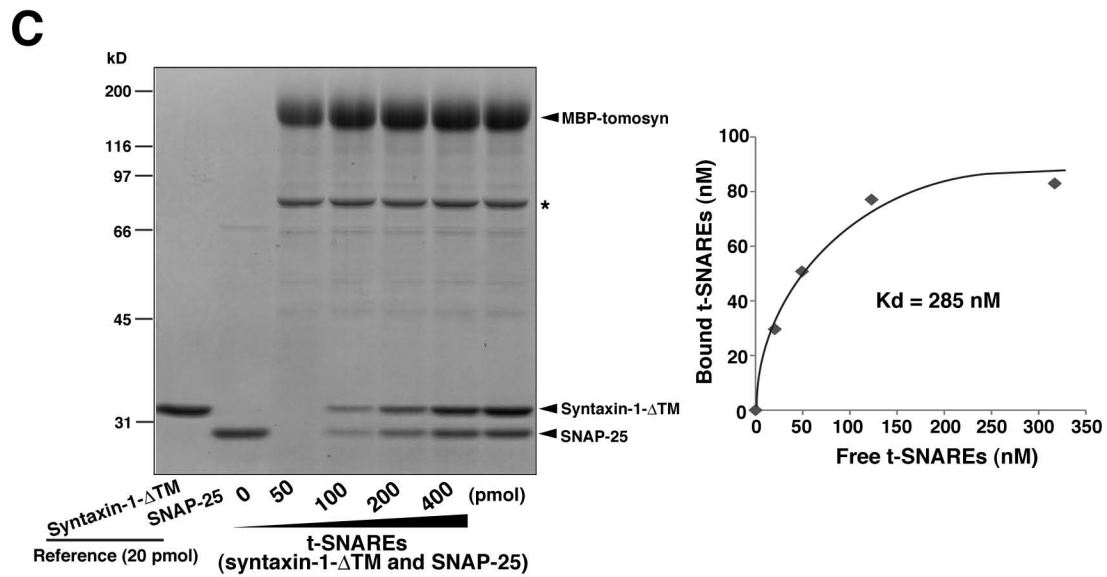

# Supplemental figure 3

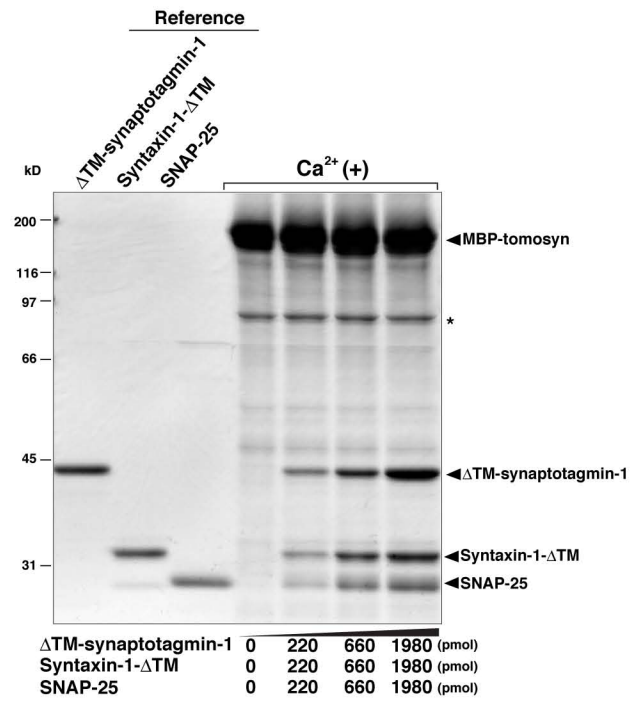

# Supplemental figure 4

**A**

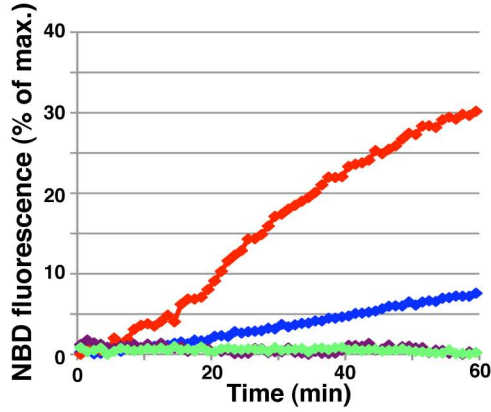

- t-SNARE vesicle + v-SNARE vesicle
- t-SNARE vesicle + v-SNARE vesicle +  $\Delta$ TM-synaptotagmin-1
- t-SNARE vesicle + v-SNARE vesicle + Tomosyn-C
- t-SNARE vesicle + v-SNARE vesicle +  $\Delta$ TM-synaptotagmin-1 + Tomosyn-C

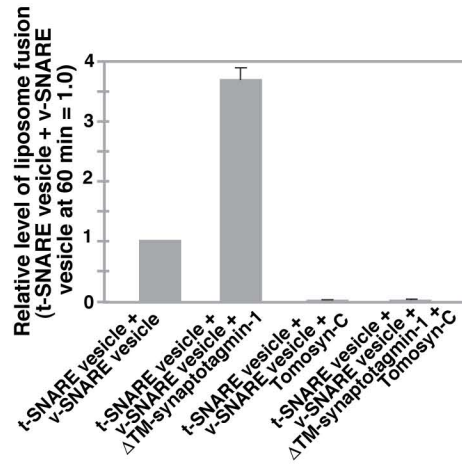

**B**

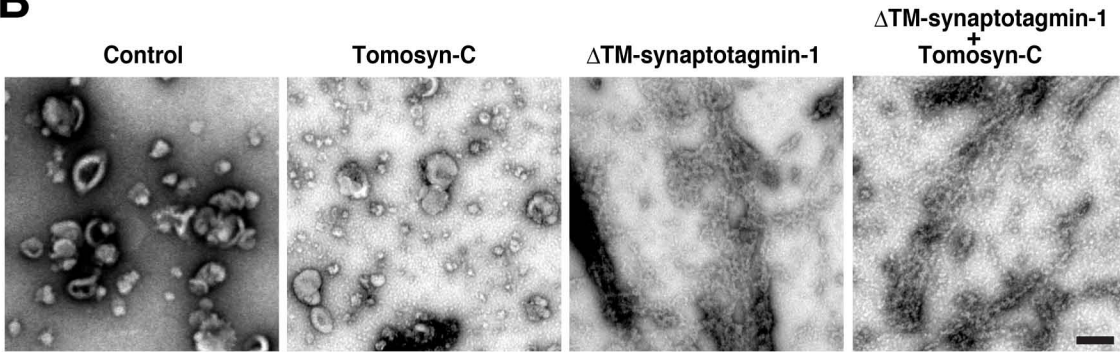

**Ca**

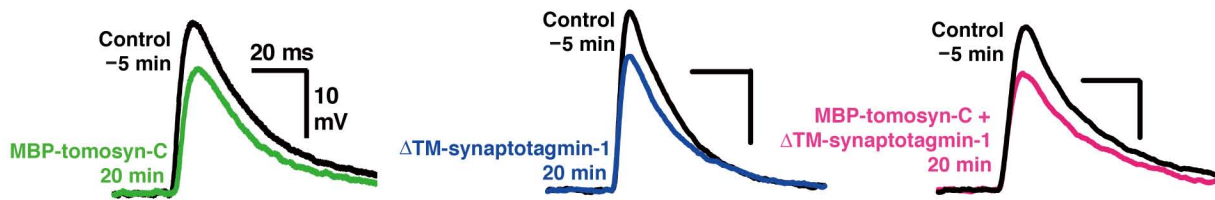

**Cb**

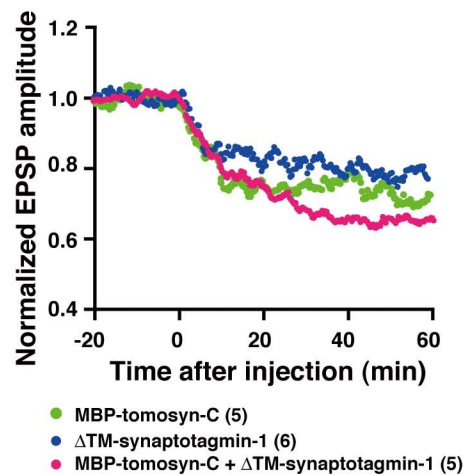

**Cc**

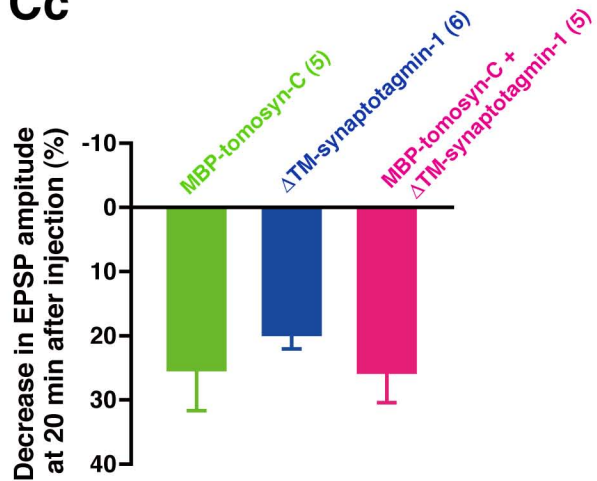

# Supplemental figure 5

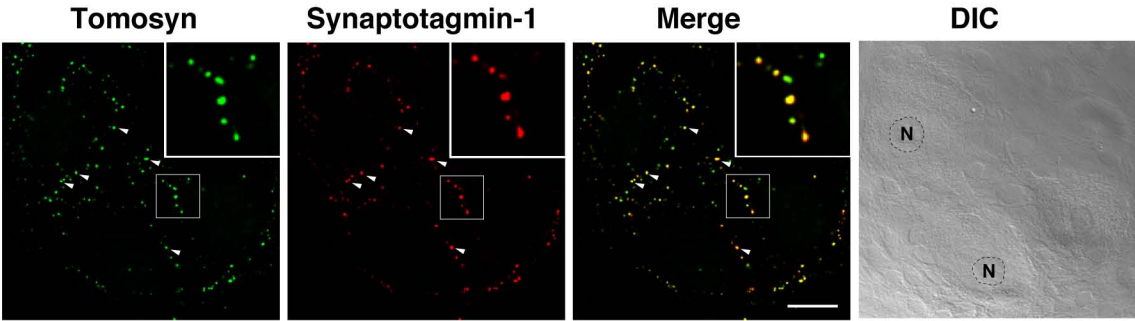

Supplement: supp_M110.156893_jbc.M110.156893-1.pdf [file supp_M110.156893_jbc.M110.156893-1.pdf]
